# Supplementary material for: Generation and miRNA Characterization of Equine Induced Pluripotent Stem Cells Derived from Fetal and Adult Multipotent Tissues
Source: PubMed Central journal article supplement (PMC6525926; doi:10.1155/2019/1393791), 2019-05-02
Supplement: 1393791.f7.pdf [file 1393791.f7.pdf]

Supplemental material 7

Chart S3: pathways regulated by miRNAs increased in eiPSCs-eUCmsc.

| Pathways regulated by miRNA Increased in umbilical iPSCs (eca-mir-302d) | Gene number | MiRNAs number |
|-------------------------------------------------------------------------|-------------|---------------|
| Lisine degradation                                                      | 4           | 1             |
| Wnt signaling pathway                                                   | 8           | 1             |
| Mucin type O-Glyan biosynthesis                                         | 2           | 1             |
| Hippo signaling pathway                                                 | 11          | 1             |
| Proteoclicans in cancer                                                 | 8           | 1             |
| Prolactin signaling pathway                                             | 4           | 1             |
| Oocyte meiosis                                                          | 5           | 1             |
| Endocytosis                                                             | 6           | 1             |
| Non-small cell lung cancer                                              | 2           | 1             |
| Pathways in cancer                                                      | 7           | 1             |
| Colorectal cancer                                                       | 3           | 1             |
