# Supplementary material for: Generation and miRNA Characterization of Equine Induced Pluripotent Stem Cells Derived from Fetal and Adult Multipotent Tissues
Source: Hindawi journal article supplement (doi:10.1155/2019/1393791), 2019-05-02
Supplement: f1 [file 1393791.f1.pdf]

## Table S1: Primers used for miRNA profile analyses on equine iPSCs

| miRNA         | Sequence                  | Fragment length |
|---------------|---------------------------|-----------------|
| eca-let-7a    | ugagguaguagguuguauaguuu   | 22              |
| eca-let-7c    | ugagguaguagguuguauugguu   | 22              |
| eca-let-7d    | agagguaguagguugcagauaguuu | 22              |
| eca-let-7f    | ugagguaguagauuguauaguuu   | 22              |
| eca-let-7g    | ugagguaguaguuuuguacaguuu  | 22              |
| eca-mir-1     | uggaauguaaaagaaguauguau   | 22              |
| eca-mir-10a   | uaccucguagaauccgaauuugug  | 23              |
| eca-mir-10b   | uaccucguagaaccgaauuugug   | 23              |
| eca-mir-15b   | uagcagcacaucaugguuuaca    | 22              |
| eca-mir-19a   | ugugcaaaucuaugcaaaacuga   | 23              |
| eca-mir-20a   | uaaagugcuuauagugcagguag   | 23              |
| eca-mir-24    | uggcucaguucagcaggaacag    | 22              |
| eca-mir-25    | cauugcacuugucucggucuga    | 22              |
| eca-mir-26a   | uucaaguaauccaggauaggcu    | 22              |
| eca-mir-27b   | uucacaguggcuagaauucugc    | 21              |
| eca-mir-28-5p | aaggagcucacagucuaauugag   | 22              |
| eca-mir-29b   | uagcaccauuugaaucaguguu    | 23              |
| eca-mir-29c   | uagcaccauuugaaaucgguuu    | 22              |
| eca-mir-30b   | uguaaacauccuacacucagcu    | 22              |
| eca-mir-30c   | uguaaacauccuacacucucagc   | 23              |
| eca-mir-31    | aggcaagaugcuggcagauagcu   | 21              |
| eca-mir-33a   | gugcauuguaguugcagauugca   | 21              |
| eca-mir-33b   | gugcauugcuguugcagauugc    | 20              |
| eca-mir-34    | uggcagugucuuagcugguugu    | 22              |
| eca-mir-92a   | uauugcacuugucccgccugu     | 22              |
| eca-mir-92b   | uauugcacucgucccgccucc     | 22              |
| eca-mir-95    | uucaacgggucuuauugagca     | 22              |
| eca-mir-96    | uuuggcacuagcacauuuuugcu   | 23              |
| eca-mir-98    | ugagguaguaaguuguauuguu    | 22              |
| eca-mir-99b   | caccgcuagaaccgaccuugcg    | 22              |
| eca-mir-105   | ucaaaugcucagacuccuguggu   | 23              |
| eca-mir-106b  | uaaagugcugacagugcagau     | 21              |
| eca-mir-122   | uggagugugacaauugguguuug   | 22              |
| eca-mir-125b  | ucccugagaccuaacuuguga     | 22              |
| eca-mir-127   | ucggauccgucugagcuuggcu    | 22              |

|                 |                          |    |
|-----------------|--------------------------|----|
| eca-mir-128     | ucacagugaaccggucucuuu    | 21 |
| eca-mir-130a    | cagugcaauguuaaaagggcau   | 22 |
| eca-mir-130b    | cagugcaaugaugaaagggcau   | 22 |
| eca-mir-132     | uacagucucacagccauggucg   | 22 |
| eca-mir-133a    | uuugguccccuuaaccagcug    | 22 |
| eca-mir-133b    | uuugguccccuuaaccagcua    | 22 |
| eca-mir-135a    | uauggcuuuuuauuccuauuguga | 23 |
| eca-mir-135b    | uauggcuuuuauuccuauuguga  | 23 |
| eca-mir-137     | uuauugcuuaagaauacgcguag  | 23 |
| eca-mir-138     | agcugguguugugaaucaggccg  | 23 |
| eca-mir-141     | uaacacugucugguaaagaugg   | 22 |
| eca-mir-145     | guccaguuuuuccaggaaucccu  | 23 |
| eca-mir-148a    | ucagugcacuacagaacuugu    | 22 |
| eca-mir-148b-3p | ucagugcaucacagaacuugu    | 22 |
| eca-mir-149     | ucuggcuccgugucuucacuccc  | 23 |
| eca-mir-150     | ucucccaaccuuguaccagug    | 22 |
| eca-mir-151-5p  | ucgaggagcucacagucuagu    | 21 |
| eca-mir-153     | uugcauagucacaaaagugauc   | 22 |
| eca-mir-155     | uuaaugcuaaucgugauaggggu  | 23 |
| eca-mir-184     | uggacggagaacugauaaggggu  | 22 |
| eca-mir-186     | caaagaauuccuuuuugggcu    | 22 |
| eca-mir-187     | ucgugucuuguguugcagccgg   | 22 |
| eca-mir-190     | ugauauguuugauauuuaggu    | 22 |
| eca-mir-190b    | ugauauguuugauauuggguu    | 21 |
| eca-mir-191     | caacggaaucccaaaagcagcug  | 23 |
| eca-mir-193a-5p | ugggucuuuugcggcgagauga   | 22 |
| eca-mir-194     | uguaacagcaacuccaugugga   | 22 |
| eca-mir-196a    | uagguaguuucauguuguuggg   | 22 |
| eca-mir-197     | uuccaccacuuccaccaccagc   | 22 |
| eca-mir-199b-5p | cccaguguuuagacuaucuguuc  | 23 |
| eca-mir-200c    | uaauacugccggguaaugugga   | 23 |
| eca-mir-204b    | uucccuuugucauccuaugccu   | 22 |
| eca-mir-205     | uccuucauuccaccggagucug   | 22 |
| eca-mir-206     | uccuucauuccaccggagucug   | 22 |
| eca-mir-208a    | auaagacgagcaaaaagcuugu   | 22 |
| eca-mir-208b    | auaagacgaacaaaagguugu    | 22 |
| eca-mir-214     | acagcaggcacagacaggcagu   | 22 |
| eca-mir-216a    | uaaucucagcuggcaacuguga   | 22 |
| eca-mir-216b    | aaaucucugcaggcaaauguga   | 22 |

|                 |                           |    |
|-----------------|---------------------------|----|
| eca-mir-222     | agcuacaucuggcuacuggggu    | 21 |
| eca-mir-223     | ugucaguuugucaaaauaccca    | 22 |
| eca-mir-302b    | uaagugcuuccauguuuuaguag   | 23 |
| eca-mir-302c    | uaagugcuuccauguuucagugg   | 23 |
| eca-mir-302d    | uaagugcuuccauguuuuagugu__ | 23 |
| eca-mir-324-5p  | cgcaucccuagggaucuggugu    | 23 |
| eca-mir-328     | cuggccucucugcccuuccgu     | 22 |
| eca-mir-331     | gccccugggccuauccuagaa     | 21 |
| eca-mir-335     | ucaagagcaauaacgaaaaaugu   | 23 |
| eca-mir-346     | ugucugcccgaugccugccucu    | 23 |
| eca-mir-361-5p  | uuaucagaauccaggguuac      | 22 |
| eca-mir-362-5p  | aauccuuggaaccuaggugugagu  | 24 |
| eca-mir-365     | uaaugcccuaaaauccuuau      | 22 |
| eca-mir-369-3p  | aaauauacaugguugaucuuu     | 21 |
| eca-mir-370     | gccugcugggguggaaccuggu    | 22 |
| eca-mir-374a    | uuauauacaaccugauaagug     | 22 |
| eca-mir-374b    | auauauacaaccugcuaagug     | 22 |
| eca-mir-376a    | aucuagaggaaaauccacgu      | 21 |
| eca-mir-377     | aucacacaaaggcaacuuugu     | 22 |
| eca-mir-379     | ugguagacuauggaacguagg     | 21 |
| eca-mir-381     | uauacaagggaagcucucugu     | 22 |
| eca-mir-382     | gaaguuguucguggugauucg     | 22 |
| eca-mir-383     | agaucagaaggugauuguggcu    | 22 |
| eca-mir-409-5p  | agguuacccgagcaacuuugcau   | 23 |
| eca-mir-410     | aaauaaacacagauggccugu     | 21 |
| eca-mir-423-5p  | ugaggggcagagagcgagacuuu   | 23 |
| eca-mir-432     | ucuuggaguaggucuuugggugg   | 23 |
| eca-mir-433     | aucaugaugggcuccuggu       | 22 |
| eca-mir-448     | uugcauaguaggauuccau       | 22 |
| eca-mir-449a    | uggcaguguauuguuagcuggu    | 22 |
| eca-mir-450a    | uuuugcgauuguuccuaauau     | 22 |
| eca-mir-450b-5p | uuuugcaauauguuccugaaua    | 22 |
| eca-mir-454     | uagugcaauauugcuauagggu    | 23 |
| eca-mir-486-5p  | uccuguacugagcugccccgag    | 22 |
| eca-mir-487b    | aaucguacagggucauccacuu    | 22 |
| eca-mir-490-3p  | caaccuggaggacuccaugcug    | 22 |
| eca-mir-491-5p  | aguggggaacccuuccaugagg    | 22 |
| eca-mir-494     | ugaaacauacacgggaaaccuc    | 22 |
| eca-mir-495     | aaacaacauggugcacuucuu     | 22 |

|                 |                           |    |
|-----------------|---------------------------|----|
| eca-mir-499-5p  | uuaagacuugcagugauguuu     | 21 |
| eca-mir-500     | uaauccuugcuaccugggugaga   | 23 |
| eca-mir-502-3p  | aaugcaccugggcaaggauuca    | 22 |
| eca-mir-505     | cgucaacacuugcugguuuccu    | 22 |
| eca-mir-16      | uagcagcacguaaauauuggcg    | 22 |
| eca-mir-21      | uagcuuauucagacugauguuga__ | 22 |
| eca-mir-23a     | aucacauugccagggaauucc_    | 21 |
| eca-mir-23b     | aucacauugccagggaauacc__   | 21 |
| eca-mir-27a     | uucacaguggcuaaguuccgc     | 21 |
| eca-mir-93      | caaagugcuguucgugcagguag   | 23 |
| eca-mir-99a     | aaccguagauccgaucuugug     | 22 |
| eca-mir-125a-5p | ucccugagaccuuuaaccuguga   | 24 |

---

Subtitle: List of the primers used for miRNA profile analysis of equine induced pluripotent stem cells prior and after remogramming.
