# Supplementary material for: Generation and miRNA Characterization of Equine Induced Pluripotent Stem Cells Derived from Fetal and Adult Multipotent Tissues
Source: Hindawi journal article supplement (doi:10.1155/2019/1393791), 2019-05-02
Supplement: f2 [file 1393791.f2.pdf]

Culture

eBMmsc

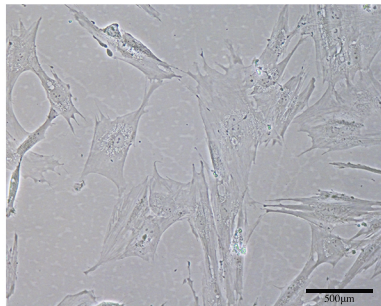

(a)

eiPSCs-eBMmsc 18 days of culture

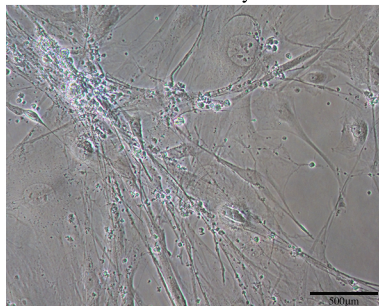

(b)

eiPSCs-eBMmsc 31 days of culture

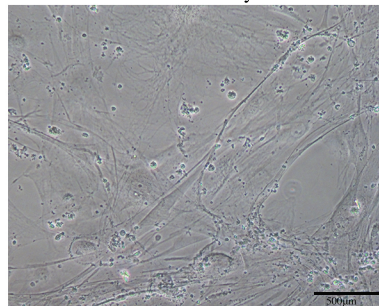

(b i)

Differentiation

Adipogenesis

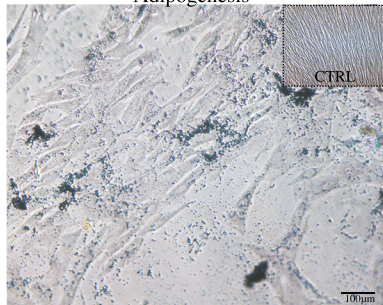

(c)

Osteogenesis

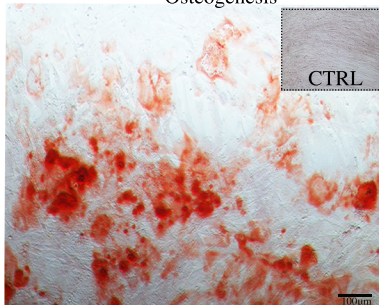

(d)

Chondrogenesis

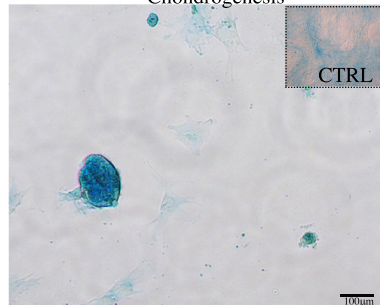

(e)
