# Supplementary material for: Generation and miRNA Characterization of Equine Induced Pluripotent Stem Cells Derived from Fetal and Adult Multipotent Tissues
Source: Hindawi journal article supplement (doi:10.1155/2019/1393791), 2019-05-02
Supplement: f5 [file 1393791.f5.pdf]

## Supplemental material 5

Chart S2: pathways regulated by miRNAs increased in eFibros.

| Pathways regulated by miRNAs increased in Fibroblast CTR | Genes number | miRNAs number |
|----------------------------------------------------------|--------------|---------------|
| Proteoglycans in cancer                                  | 111          | 5             |
| Adherens junction                                        | 52           | 5             |
| TGF-beta signaling pathway                               | 49           | 5             |
| Hippo signaling pathway                                  | 75           | 5             |
| Hepatitis B                                              | 79           | 5             |
| Prion diseases                                           | 15           | 5             |
| Viral carcinogenesis                                     | 102          | 5             |
| Lysine degradation                                       | 28           | 5             |
| Glioma                                                   | 40           | 5             |
| Thyroid hormone signaling pathway                        | 67           | 5             |
| Pathways in cancer                                       | 189          | 5             |
| ECM-receptor interaction                                 | 34           | 5             |
| Oocyte meiosis                                           | 64           | 5             |
| Renal cell carcinoma                                     | 39           | 5             |
| Chronic myeloid leukemia                                 | 45           | 5             |
| Cell cycle                                               | 70           | 5             |
| Protein processing in endoplasmic reticulum              | 87           | 5             |
| FoxO signaling pathway                                   | 75           | 5             |
| Bacterial invasion of epithelial cells                   | 44           | 5             |
| Ubiquitin mediated proteolysis                           | 76           | 5             |
| Transcriptional misregulation in cancer                  | 82           | 5             |
| AMPK signaling pathway                                   | 66           | 5             |
| Fatty acid biosynthesis                                  | 4            | 5             |
| mTor signaling pathway                                   | 38           | 5             |
| Prostate cancer                                          | 51           | 5             |
| Focal adhesion                                           | 103          | 5             |
| Bladder cancer                                           | 27           | 5             |
| Estrogen signaling pathway                               | 49           | 5             |
| Endocytosis                                              | 95           | 5             |
| Neurotrophin signaling pathway                           | 63           | 5             |
| Thyroid cancer                                           | 18           | 5             |
| Shigellosis                                              | 37           | 5             |
| Colorectal cancer                                        | 34           | 5             |
| Endometrial cancer                                       | 29           | 5             |
| p53 signaling pathway                                    | 38           | 5             |
| HIF-1 signaling pathway                                  | 55           | 5             |
| Signaling pathways regulating pluripotency of stem cells | 67           | 5             |
| Insulin signaling pathway                                | 69           | 5             |
| Small cell lung cancer                                   | 45           | 5             |
| Regulation of actin cytoskeleton                         | 93           | 5             |
| ErbB signaling pathway                                   | 45           | 5             |
| Phosphatidylinositol signaling system                    | 41           | 5             |
| Pancreatic cancer                                        | 36           | 5             |
| Non-small cell lung cancer                               | 30           | 5             |
| Wnt signaling pathway                                    | 63           | 5             |
| Sphingolipid signaling pathway                           | 56           | 5             |
| GnRH signaling pathway                                   | 45           | 5             |
| Inositol phosphate metabolism                            | 28           | 5             |
| Melanoma                                                 | 34           | 5             |
| Acute myeloid leukemia                                   | 29           | 5             |
| Central carbon metabolism in cancer                      | 31           | 5             |
| Progesterone-mediated oocyte maturation                  | 44           | 5             |
| HTLV-I signaling pathway                                 | 112          | 5             |
| PI3K-Akt signaling pathway                               | 142          | 5             |
| TNF signaling pathway                                    | 53           | 5             |
| MAPK signaling pathway                                   | 104          | 5             |
| Apoptosis                                                | 38           | 5             |
| Gap junction                                             | 40           | 5             |
