# Supplementary material for: Generation and miRNA Characterization of Equine Induced Pluripotent Stem Cells Derived from Fetal and Adult Multipotent Tissues
Source: Hindawi journal article supplement (doi:10.1155/2019/1393791), 2019-05-02
Supplement: f8 [file 1393791.f8.pdf]

## Supplemental material 8

Chart S4: pathways regulated by miRNAs increased in eUCMSC.

| Pathways regulated by miRNA Increased in umbilical CTR     | Gene number | MiRNAs number |
|------------------------------------------------------------|-------------|---------------|
| Prion diseases                                             | 9           | 2             |
| Fatty acid biosynthesis                                    | 1           | 1             |
| Proteoglycans in cancer                                    | 51          | 2             |
| Adherens junction                                          | 21          | 2             |
| p53 signaling pathway                                      | 23          | 2             |
| Viral carcinogenesis                                       | 45          | 2             |
| Fatty acid metabolism                                      | 7           | 2             |
| Glycosphingolipid biosynthesis – lacto and neolacto series | 4           | 2             |
| Phosphatidylinositol signaling system                      | 20          | 2             |
| Glioma                                                     | 18          | 2             |
| HIF-1 signaling pathway                                    | 28          | 2             |
| Pathways in cancer                                         | 76          | 2             |
| mTor signaling pathway                                     | 18          | 2             |
| Renal cell carcinoma                                       | 17          | 2             |
| Thyroid hormonesignaling pathway                           | 30          | 2             |
| Non-small cell lung cancer                                 | 15          | 2             |
| Central carbon metabolism in cancer                        | 16          | 2             |
| Cell cycle                                                 | 29          | 2             |
| Focal adhesion                                             | 45          | 2             |
| Regulation of actin cytoskeleton                           | 44          | 2             |
